# Supplementary material for: Clinical validation of Whole Genome Sequencing for cancer diagnostics
Source: bioRxiv or medRxiv preprint supplement (doi:10.1101/2020.10.29.20222091), 2021-02-18
Supplement: Supplementary file [file media-4.pdf]

### WGS sensitivity model considering:

|                     |     |
|---------------------|-----|
| Tumor ploidy        | 2   |
| Variant copy number | 1   |
| x (Required reads)  | 5   |
| purity\coverage     | 100 |

| Tumor purity | Sensitivity |
|--------------|-------------|
| 0.19         | 95.97       |

Model details per 0.05 purity and coverage

| purity\coverage | 5     | 10    | 15    | 20    | 25    | 30    | 35    | 40     | 50     | 60     | 70     | 80     | 90     | 100    | 120    | 150    | 200    | 250    | 300    |
|-----------------|-------|-------|-------|-------|-------|-------|-------|--------|--------|--------|--------|--------|--------|--------|--------|--------|--------|--------|--------|
| 0.05            | 0.00  | 0.00  | 0.00  | 0.02  | 0.05  | 0.11  | 0.21  | 0.37   | 0.91   | 1.86   | 3.29   | 5.27   | 7.80   | 10.88  | 18.47  | 32.25  | 55.95  | 74.70  | 86.79  |
| 0.1             | 0.00  | 0.02  | 0.11  | 0.37  | 0.91  | 1.86  | 3.29  | 5.27   | 10.88  | 18.47  | 27.46  | 37.12  | 46.79  | 55.95  | 71.49  | 86.79  | 97.07  | 99.47  | 99.91  |
| 0.15            | 0.00  | 0.11  | 0.60  | 1.86  | 4.21  | 7.80  | 12.61 | 18.47  | 32.25  | 46.79  | 60.22  | 71.49  | 80.30  | 86.79  | 94.50  | 98.72  | 99.91  | 100.00 | 100.00 |
| 0.2             | 0.02  | 0.37  | 1.86  | 5.27  | 10.88 | 18.47 | 27.46 | 37.12  | 55.95  | 71.49  | 82.70  | 90.04  | 94.50  | 97.07  | 99.24  | 99.91  | 100.00 | 100.00 | 100.00 |
| 0.25            | 0.05  | 0.91  | 4.21  | 10.88 | 20.62 | 32.25 | 44.40 | 55.95  | 74.70  | 86.79  | 93.60  | 97.07  | 98.72  | 99.47  | 99.91  | 100.00 | 100.00 | 100.00 | 100.00 |
| 0.3             | 0.11  | 1.86  | 7.80  | 18.47 | 32.25 | 46.79 | 60.22 | 71.49  | 86.79  | 94.50  | 97.89  | 99.24  | 99.74  | 99.91  | 99.99  | 100.00 | 100.00 | 100.00 | 100.00 |
| 0.35            | 0.21  | 3.29  | 12.61 | 27.46 | 44.40 | 60.22 | 73.13 | 82.70  | 93.60  | 97.89  | 99.36  | 99.82  | 99.95  | 99.99  | 100.00 | 100.00 | 100.00 | 100.00 | 100.00 |
| 0.4             | 0.37  | 5.27  | 18.47 | 37.12 | 55.95 | 71.49 | 82.70 | 90.04  | 97.07  | 99.24  | 99.82  | 99.96  | 99.99  | 100.00 | 100.00 | 100.00 | 100.00 | 100.00 | 100.00 |
| 0.45            | 0.60  | 7.80  | 25.12 | 46.79 | 66.16 | 80.30 | 89.30 | 94.50  | 98.72  | 99.74  | 99.95  | 99.99  | 100.00 | 100.00 | 100.00 | 100.00 | 100.00 | 100.00 | 100.00 |
| 0.5             | 0.91  | 10.88 | 32.25 | 55.95 | 74.70 | 86.79 | 93.60 | 97.07  | 99.47  | 99.91  | 99.99  | 100.00 | 100.00 | 100.00 | 100.00 | 100.00 | 100.00 | 100.00 | 100.00 |
| 0.55            | 1.33  | 14.46 | 39.56 | 64.25 | 81.53 | 91.38 | 96.28 | 98.49  | 99.78  | 99.97  | 100.00 | 100.00 | 100.00 | 100.00 | 100.00 | 100.00 | 100.00 | 100.00 | 100.00 |
| 0.6             | 1.86  | 18.47 | 46.79 | 71.49 | 86.79 | 94.50 | 97.89 | 99.24  | 99.91  | 99.99  | 100.00 | 100.00 | 100.00 | 100.00 | 100.00 | 100.00 | 100.00 | 100.00 | 100.00 |
| 0.65            | 2.51  | 22.83 | 53.73 | 77.63 | 90.73 | 96.56 | 98.83 | 99.63  | 99.97  | 100.00 | 100.00 | 100.00 | 100.00 | 100.00 | 100.00 | 100.00 | 100.00 | 100.00 | 100.00 |
| 0.7             | 3.29  | 27.46 | 60.22 | 82.70 | 93.60 | 97.89 | 99.36 | 99.82  | 99.99  | 100.00 | 100.00 | 100.00 | 100.00 | 100.00 | 100.00 | 100.00 | 100.00 | 100.00 | 100.00 |
| 0.75            | 4.21  | 32.25 | 66.16 | 86.79 | 95.64 | 98.72 | 99.66 | 99.91  | 100.00 | 100.00 | 100.00 | 100.00 | 100.00 | 100.00 | 100.00 | 100.00 | 100.00 | 100.00 | 100.00 |
| 0.8             | 5.27  | 37.12 | 71.49 | 90.04 | 97.07 | 99.24 | 99.82 | 99.96  | 100.00 | 100.00 | 100.00 | 100.00 | 100.00 | 100.00 | 100.00 | 100.00 | 100.00 | 100.00 | 100.00 |
| 0.85            | 6.46  | 41.99 | 76.20 | 92.56 | 98.06 | 99.55 | 99.91 | 99.98  | 100.00 | 100.00 | 100.00 | 100.00 | 100.00 | 100.00 | 100.00 | 100.00 | 100.00 | 100.00 | 100.00 |
| 0.9             | 7.80  | 46.79 | 80.30 | 94.50 | 98.72 | 99.74 | 99.95 | 99.99  | 100.00 | 100.00 | 100.00 | 100.00 | 100.00 | 100.00 | 100.00 | 100.00 | 100.00 | 100.00 | 100.00 |
| 0.95            | 9.28  | 51.46 | 83.81 | 95.97 | 99.17 | 99.85 | 99.98 | 100.00 | 100.00 | 100.00 | 100.00 | 100.00 | 100.00 | 100.00 | 100.00 | 100.00 | 100.00 | 100.00 | 100.00 |
| 1               | 10.88 | 55.95 | 86.79 | 97.07 | 99.47 | 99.91 | 99.99 | 100.00 | 100.00 | 100.00 | 100.00 | 100.00 | 100.00 | 100.00 | 100.00 | 100.00 | 100.00 | 100.00 | 100.00 |

### Goal

The goal is to use a simple model to estimate what percentage of the non-subclonal mutations of a sample of tumor cells we should detect for various combinations of purity, ploidy, coverage, distribution of variant copy numbers, and number of reads required to be called as a variant.

### Definitions

Consider a sample that is a mixture of germline and tumor cells.

Define the purity  $P$  as the (exact) percentage of the cells that is a tumor cell.

Suppose the following:

- The sample has been sequenced.
- All tumor cells are genetically identical.
- All germline cells are genetically identical.
- The germline genome is known precisely.
- All mutations in the tumor genome wrt the germline genome are SNV's.
- The tumor ploidy is equal to  $M$ .
- All reads of the tumor sample have the exact same length  $L$ .

Define  $C$  as the average coverage of the tumor sample.

Let  $N$  be the number of variants present in the tumor genome wrt the germline genome, and label these variants  $v_1, v_2, \dots, v_N$ .

Let  $V_i$  be the variant copy number of the variant  $v_i$ , and let  $r_i$  be the number of reads required to call  $v_i$  as a variant, for  $i=1, \dots, N$ .

### Model

Let  $X$  be the number of variants that we actually detect. Now what is the probability distribution of  $X$ ? What is the expectation of  $X$ ?

Define  $Y_i$  as " $v_i$  was detected" and  $Z_i$  as "the number of reads of  $v_i$  found from the tumor sample sequencing" for  $i=1, \dots, N$ .

This means that  $Y_i$  is equivalent to " $Z_i \geq r_i$ ", so  $Y_i$  is a Bernoulli stochastic variable with success probability  $q_i = P(Z_i \geq r_i)$ .

Since  $X$  is by definition the number of  $Y_i$ 's that are a success, it might be tempting to say that  $X$  is binomially distributed.

There is a potential problem that the  $Y_i$ 's are not independent, strictly speaking, because all of the reads are taken from the same pool of DNA from the tumor sample.

Fortunately, this interdependence is weak enough that assuming independence can still be reasonably justified.

Since the  $q_i$  are not necessarily all identical,  $X$  is actually Poisson binomially distributed with probabilities  $q_1, \dots, q_N$ .

This implies that  $E(X) = \sum q_i$  and  $\text{Var}(X) = \sum q_i(1-q_i)$

The proportion of the existing variants that we actually detect is equal to  $X/N$ , and we see that  $E(X/N) = \sum(q_i)/N$  and  $\text{Var}(X/N) = \sum(q_i(1-q_i))/N^2$

Note that independence of the  $Y_i$  is not required to determine the formula for the expectation, since  $X = \sum(1_{\{Y_i\}})$  would still be true without this assumption.

For this model to be useful, we need to be able to calculate or approximate the probabilities  $q_i = P(Z_i \geq r_i)$ .

The derivation below explains why  $\text{Poisson}(P \cdot V_i C / (P \cdot (M-2) + 2))$  is a reasonable approximation to the distribution of  $Z_i$ .

### Poisson Derivation

Each read from the sequencing is independently chosen out of all of the pieces of DNA of appropriate length in the prepared sample.

A haploid human genome contains  $c \approx 3.1$  billion base pairs. This means that in the sequencing of the tumor genome, the total number of reads was  $C \cdot c/L$ , so at least a few million.

Then  $Z_i$  is binomially distributed, let's say  $\text{bin}(n_i, p_i)$ . Then  $n_i = C \cdot c/L$  and  $p_i = \text{"percentage of total reads that include variant } v_i \text{"}$

In the genome there are  $L$  spots where a read could start to include the position of  $v_i$ . If we let  $N_c$  be the number of cells in the tumor sample, then

$p_i = \text{"number of positions in all of the DNA in the tumor sample where a read can start, if it needs to contain } v_i \text{"} / \text{"number of positions in all of the DNA in the tumor sample where a read can start"}$

$= \text{"number of tumor cells"} \cdot \text{"number of positions in the DNA of a tumor cell where reads containing } v_i \text{ can start"} / \text{"total number of bases in all of the DNA of all of the cells in the tumor sample, combined"}$

$= (N_c \cdot P \cdot V_i \cdot L) / (N_c \cdot P \cdot M \cdot c + N_c \cdot (1-P) \cdot 2 \cdot c) = P \cdot V_i \cdot L / (c \cdot (P \cdot (M-2) + 2))$

$p_i$  is a very small number.

Since  $n_i$  is so large and  $p_i$  is so small, the distribution of  $Z_i$  can reasonably be approximated by a Poisson( $\lambda_i$ ) distribution with  $\lambda_i = n_i \cdot p_i = P \cdot V_i \cdot C / (P \cdot (M-2) + 2)$ .
